# Supplementary material for: Effects of Destruxin A on Silkworm’s Immunophilins
Source: MDPI journal article supplement (doi:10.3390/toxins11060349), 2019-06-18
Supplement: s1 [file s1]

## Supplementary Materials: Effects of Destruxin A on Silkworm's Immunophilins

Jingjing Wang, Qunfang Weng and Qiongbo Hu \*

**Commented [M1]:** Please carefully check the accuracy of names. Changes will not be possible after proofreading.

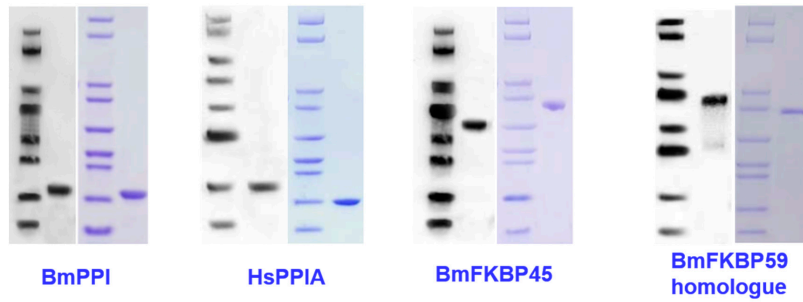

**Figure S1.** All proteins in this paper were successfully expressed and purified in *E. coli*. Left part of each picture was western blot verification of expression, right part was verification of purification. Marker of each picture from top to bottom are 160, 120, 70, 50, 40, 35, 20, 10 kD.
